# Supplementary material
Source: Springer Nature journal article supplement (https://www.springermedizin.de/resource/supplementary/13102_2013_45_MOESM4_ESM.pdf/9686484)

**a)**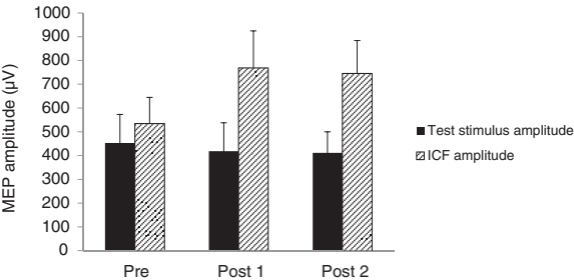**b)**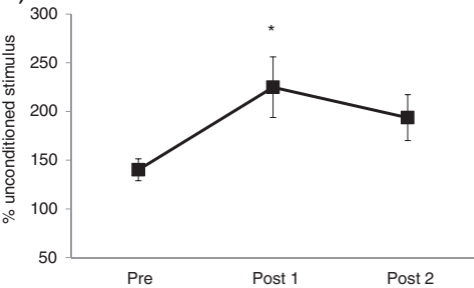

Supplement: MOESM4 [file 9686484]
